## CcnA, a novel non-coding RNA regulating the bacterial cell cycle

Wanassa Beroual<sup>1</sup>, David Lalaoua<sup>2</sup>, Nadia Ben Zaina<sup>1</sup>, Odile Valette<sup>1</sup>, Karine Prévost<sup>2</sup>, Yann Denis,  
Meriem Djendli<sup>1</sup>, Matteo Brilli<sup>3</sup>, Robledo Marta<sup>4</sup>, Jimenez-Zurdo Jose-Ignacio<sup>4</sup>, Eric Massé<sup>2</sup>,  
Emanuele G. Biondi<sup>1\*</sup>

1. Aix Marseille Univ, CNRS, LCB, Marseille, France
2. Department of Biochemistry, RNA Group, Université de Sherbrooke, Sherbrooke, QC, Canada
3. Pediatric Clinical Research Center "Romeo ed Enrica Invernizzi", Department of Biosciences, University of Milan, Milan, Italy
4. Grupo de Ecología Genética de la Rizosfera, Estación Experimental del Zaidín, Consejo Superior de Investigaciones Científicas (CSIC), Granada, Spain

\* Corresponding author: [ebiondi@imm.cnrs.fr](mailto:ebiondi@imm.cnrs.fr)

Keywords: *Caulobacter crescentus*, ncRNA, cell cycle, regulation of expression, translation, transcription

### 20 Summary

Bacterial cells are powerful models for understanding how cells divide and accomplish global regulatory programs. In *Caulobacter crescentus* a cascade of essential master regulators regulate the correct and sequential activation of DNA replication, cell division and development of different cell types. Among them CtrA plays a crucial role coordinating all those functions. Despite decades of investigation, no control by non-coding RNAs (ncRNAs) has been linked to *Caulobacter* cell cycle. Here, for the first time we describe the role of a novel essential factor named CcnA, a ncRNA located at the origin of replication, activated by CtrA and responsible for the rapid and strong accumulation of CtrA itself. In addition CcnA is also responsible for the inhibition of GcrA translation by direct interaction with its UTR region. By a combination of probing experiments and mutagenesis, we propose a new mechanism by liberation (CtrA) or sequestration (GcrA) of the Ribosome Binding Site (RBS). CcnA role is conserved in other alphaproteobacterial species, such as *Sinorhizobium meliloti*, representing indeed a conserved and fundamental process regulating cell cycle in *Rhizobiales* and *Caulobacterales*.

## 34 Introduction

35 *Caulobacter crescentus* is a pivotal model organism to understand how basic functions of the cell  
36 physiology are organized and coordinated through the cell cycle (Collier, 2012; Skerker and Laub,  
37 2004). *Caulobacter* combines the cultivation and genetic simplicity of a prokaryotic system with an  
38 intricacy of regulation that is paradigmatic of global regulatory programs of higher organisms.  
39 Transcriptional regulation plays a major role during cell cycle progression as several master regulators  
40 are sequentially activated in order to induce transcription of genes required at a specific phase of the  
41 cycle (Figure 1A) (Collier et al., 2006, 2007; Reisenauer and Shapiro, 2002). Each phase is under the  
42 control of a specific master regulator: (i) the initiation of the S-phase depends on DnaA, (ii) the first  
43 part of S-phase depends on GcrA and CcrM, while (iii) the second part depends on CtrA which is also  
44 the regulator of the phase G1 of swarmer cells (Panis et al., 2015). The interconnections of these four  
45 transcriptional regulators create a complex network whose behavior derives from the integration of  
46 multiple levels of regulation around master regulators. In particular, a central role is played by the  
47 essential response regulator CtrA, which controls directly or indirectly all the other master regulators  
48 of the cell cycle (Laub et al., 2002). CtrA is notably responsible for the direct transcriptional activation  
49 of key cell division genes and the biogenesis of polar structures (flagellum, stalk and pili). CtrA also  
50 activates the transcription of the orphan adenine methyl transferase CcrM encoding gene, which in  
51 turn is required for the fine-tuned regulation of the promoter P1 of *ctrA* (Reisenauer and Shapiro,  
52 2002). Moreover CtrA indirectly blocks the activity of DnaA at the single origin of the chromosome  
53 replication (CORI) by direct binding to sites that are competing with DnaA sites required for initiation  
54 of DNA replication (Marczynski and Shapiro, 2002; Quon et al., 1998). Finally another master  
55 regulator, named GcrA, activates *ctrA* (together with the CcrM methylation as mentioned earlier),  
56 which in turns represses *gcrA* by direct binding to its promoter (Fioravanti et al., 2013; Haakonsen  
57 et al., 2015; Holtzendorff et al., 2004). CtrA encoding gene is activated by two promoters, a GcrA-  
58 dependent P1, which is activated by the conversion of a CcrM methylation site from its full to the  
59 hemi-methylation state approximately after 1/3 of DNA replication (Reisenauer and Shapiro, 2002).  
60 This P1 activation is responsible for the first weak accumulation of CtrA, which in turns starts  
61 activating a second stronger promoter P2, closer to the ATG, responsible for the robust accumulation  
62 of CtrA in the second half of DNA replication and the repression of P1 and *gcrA* transcription.  
63 Although the molecular details of this biphasic activation of *ctrA* are still partially understood, the  
64 stronger activation of P2 may underline other post-transcriptional mechanisms reinforcing CtrA  
65 accumulation. CtrA in order to be fully active requires phosphorylation by the CckA-ChpT  
66 phosphorelay (Biondi et al., 2006a). The hybrid kinase CckA has a bipolar localization (Biondi et al.,  
67 2006a; Chen et al., 2011; Jacobs et al., 2003). At the swarmer pole it acts as kinase thanks to the  
68 presence of DivL and DivK non-phosphorylated (Gora et al., 2010) by the presence of its phosphatase  
69 PleC. On the contrary CckA is a phosphatase at the stalked pole, in which the kinase DivJ keeps DivK  
70 fully phosphorylated inhibiting the phosphorelay.  
71 As CtrA~P blocks the origin of replication, a complex degradation machinery ensures its cell cycle  
72 dependent degradation at the G1 to S-phase transition and after cell division in the stalk compartment  
73 (Joshi et al., 2015; Ryan et al., 2004). A cascade of adapter proteins (CpdR, RcdA and PopA) is  
74 responsible for the specific and highly regulated proteolysis of CtrA.  
75 In *Caulobacter*, the regulation of gene expression by ncRNAs has revealed few examples. Initially  
76 only 27 ncRNAs were described in this organism (Landt et al., 2008). CrfA is an sRNA involved in  
77 adaptation to carbon starvation (Landt et al., 2010). GsrN is involved in the response to  $\sigma^T$ -dependent  
78 multiple stresses (Tien et al., 2017). Finally ChvR has been recently characterized as a ncRNA that is  
79 expressed in response to DNA damage, low pH, and growth in minimal medium (Fröhlich et al.,  
80 2018). However as new recent approaches using RNAseq and post-genomic techniques expanded the  
81 *plethora* of ncRNA candidates to more than 100 (Zhou et al., 2015), predictions of their integration  
82 into the cell cycle circuit (Beroual et al., 2018) has suggested that several new candidate ncRNAs  
83 should be deeply studied.  
84 Here we investigated the role of a ncRNA, named CcnA, that belongs to the origin of replication of  
85 *Caulobacter* chromosome. We studied its role by the construction of deletion mutants, silencing by  
86 expression of its antisense and over expression. Results presented in this work identified the mRNAs  
87 of CtrA and GcrA, two master regulators of cell cycle, as main targets of this ncRNA. Data were

# Figure 1

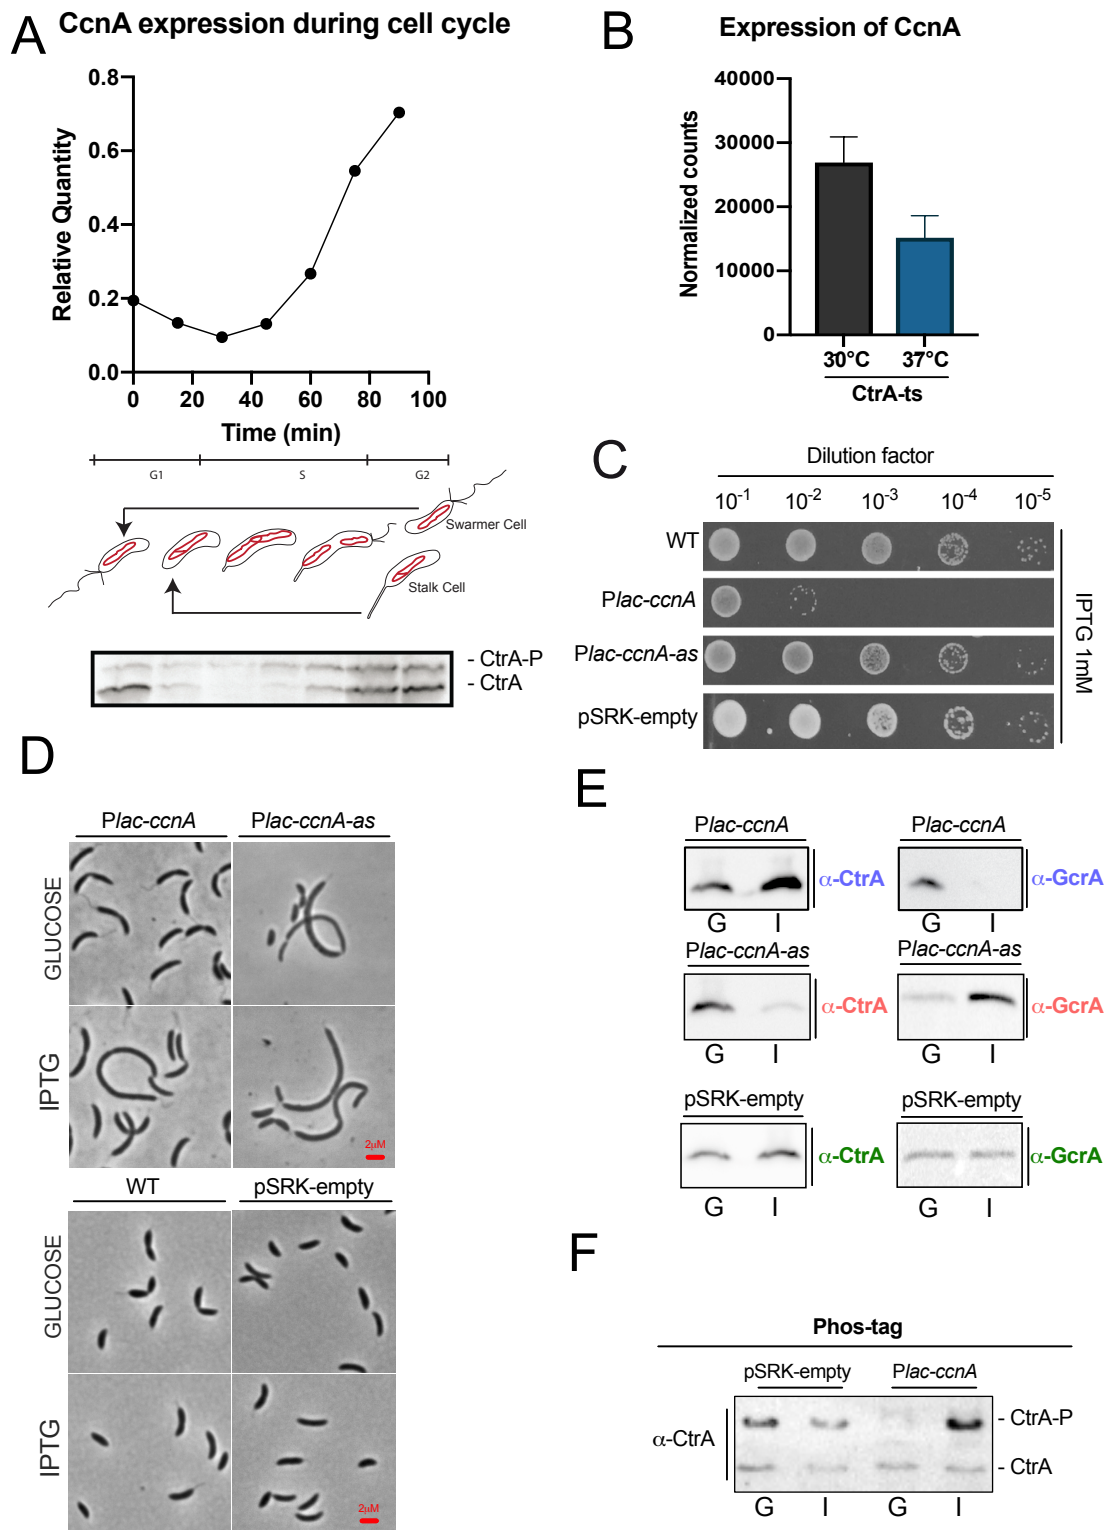

Figure 1. CcnA (Cell Cycle Non-coding RNA) regulates cell cycle. A. Levels of CcnA were compared to 16S by qRT-PCR. Samples from a synchronized population (see schematics below the plot) were isolated and RNA was extracted. On the same synchronized samples Phos-Tag anti-CtrA was performed measuring both protein and phosphorylation levels. B. A temperature sensitive allele of *ctrA* (*CtrA401*) was used to measure CcnA RNA levels at 30°C and 37°C. Expression of CcnA drops upon inactivation of CtrA. C. Phase contrast images of strains overexpressing CcnA (*Plac-ccnA*), its antisense (*Plac-ccnA-as*), wild type (WT) and the empty vector (*pSRK-empty*). D. Cultures of the strains of panel C were grown until 0,6 and grown at different dilutions. E. Western blots using anti-CtrA and anti-GcrA antibodies in *Plac-ccnA*, *Plac-ccnA-as* and empty vector using glucose and IPTG conditions (see M&M). Upon induction of CcnA, CtrA levels increase while they decrease when expressing the antisense of CcnA. For GcrA we observed the opposite situation, while the empty vector doesn't show any variation between glucose and IPTG. F. Phos-tag gel anti-CtrA of the strain *Plac-ccnA* in comparison with the strain containing the empty vector in glucose and IPTG conditions.

88 supported by a combination of MAPS, *in vitro* and *in vivo* experiments. Finally the role of CcnA in a  
89 closely related organism such as *Sinorhizobium meliloti* suggested its potential conservation across  
90 bacteria.  
91

## 92 **Results**

### 93 **CcnA expression is regulated by CtrA**

94  
95 Based on previous results (Zhou et al., 2015) we observed that CCNA\_R0094, here named Cell Cycle  
96 non-coding RNA A (CcnA), expression peaks after few minutes from the accumulation of *ctrA*  
97 transcript and protein, in the second half of the S-phase, when P2, the second *ctrA* promoter, is  
98 activated (Fig 1A).

99 We designed primers to detect and precisely quantify *ccnA* RNA in the cells by q-RT-PCR (see  
100 M&M) with respect to 16S RNA levels. A synchronized population of wild type *C. crescentus* was  
101 used to collect cells at 15 minutes time points of the cell cycle in rich medium (generation time is 96  
102 minutes). CcnA levels start increasing at 45 minutes, coincidentally with CtrA protein levels (Figure  
103 1A). More specifically we measured both protein and phosphorylation levels of CtrA by Phos-Tag  
104 gels (Figure 1A). CcnA levels increase as CtrA~P levels increase (Figure 1A), suggesting that the  
105 transcription of *ccnA* potentially depends on phosphorylated CtrA. This observation prompted us the  
106 question whether CtrA was responsible for *ccnA* transcription. Consistently upstream of the annotated  
107 Transcriptional Start Site (TSS) of *ccnA* a CtrA box was previously described (Brilli et al., 2010; Zhou  
108 et al., 2015).

109 In order to respond to this question, we performed RNAseq using a CtrA thermo-sensitive (CtrA-ts)  
110 allele specifically looking for variations of *ccnA* expression in the context of the global transcriptional  
111 changes that depended on functional CtrA (Figure 1B). A previously characterized thermo-sensitive  
112 allele of CtrA (Biondi et al., 2006a; Laub et al., 2002; Quon et al., 1996) was used at 30°C and 37°C,  
113 respectively the permissive and restrictive temperature at which CtrA completely loses its  
114 functionality. The analysis revealed that expression of CcnA significantly decreases between 37° C  
115 and 30° C, suggesting that CtrA is required for *ccnA* transcription, as suggested by the presence of the  
116 predicted binding site in *ccnA* promoter region.

117 In conclusion CcnA is a sRNA activated by the master regulator of cell cycle CtrA peaking its  
118 expression when CtrA itself strongly accumulates.

119

### 120 **CcnA is responsible for the accumulation of CtrA and inhibition of GcrA**

121

122 Aiming to understand the function of CcnA, we fused the sequence of *ccnA* with the +1 of a *Plac*  
123 promoter in the vector pSRK (Khan et al., 2008) in order to make an IPTG-inducible version of the  
124 ncRNA. This vector was introduced in *C. crescentus* cells, its induction was measured and the  
125 phenotype was observed (Figure 1C, D). Even in glucose *Plac-ccnA* cells showed cell cycle defects,  
126 such as slow growth, cell division abnormal morphologies, with an increased number of abnormal  
127 long stalks. The level of *ccnA* in this inducible system was quantified by q-RT-PCR (see Mat and Met)  
128 confirming that this strain indeed expresses a high level of *ccnA* even in glucose (Figure S1).

129 Several tests were performed in order to characterize these phenotypes. Morphologically we used  
130 MicrobeJ to quantify cell size parameters (Ducret et al., 2016). Results showed that cells were  
131 elongated with respect to wild type cells (Figure S2).

132 Stalk biogenesis and swarmer cells morphogenesis are both under the control of the master regulator  
133 CtrA (Biondi et al., 2006b; Quon et al., 1996) suggesting that CcnA may act on CtrA production.  
134 Therefore we quantified CtrA levels in the overexpression strain. Results showed that upon  
135 expression/overexpression of CcnA CtrA accumulates abnormally showing more CtrA than the  
136 control strain (Figure 1E). We also tested other proteins, such as DnaA, but it didn't change upon  
137 CcnA expression (Figure S3). This suggests that CcnA has an effect on the production of the master  
138 regulator and phenotypes observed may be a direct consequence of this over production of CtrA.

# Figure 2

## A

MAPS technique: Simplified schematic representation

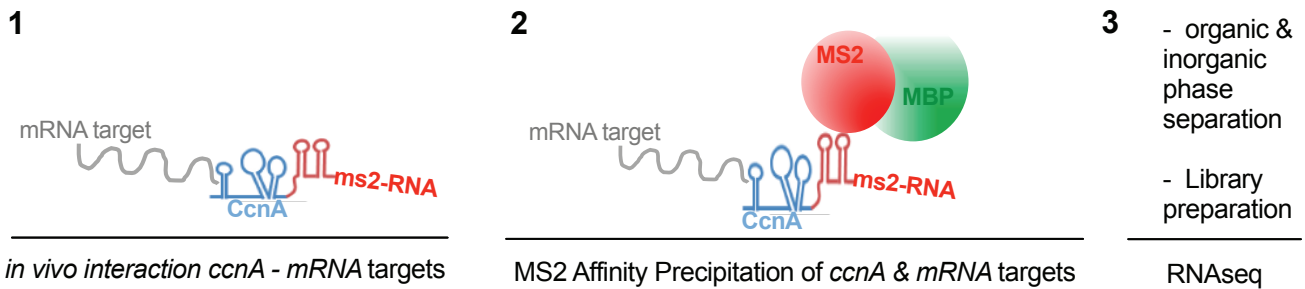

## B

| Name         | Synonym    | Product                                             | Ratio MS/neg | CtrA controlled |
|--------------|------------|-----------------------------------------------------|--------------|-----------------|
| <i>bacA</i>  | CCNA_01949 | bactofilin A BacA                                   | 114          |                 |
| <i>ctrA</i>  | CCNA_03130 | cell cycle response regulator ctrA                  | 99           | yes             |
| -            | CCNA_01978 | methyltransferase                                   | 95           |                 |
| <i>hfaD</i>  | CCNA_02713 | holdfast attachment protein hfaD                    | 71           | yes             |
| <i>tacA</i>  | CCNA_03424 | AAA-family response regulator tacA                  | 66           | yes             |
| -            | CCNA_00727 | ribosomal-protein-alanine acetyltransferase         | 59           |                 |
| <i>flgF</i>  | CCNA_02142 | flagellar basal-body rod protein flgF               | 49           |                 |
| <i>pleA</i>  | CCNA_02411 | putative lytic transglycosylase PleA                | 42           |                 |
| <i>clpA</i>  | CCNA_02553 | ATP-dependent clp protease ATP-binding subunit ClpA | 37           | yes             |
| <i>phoR</i>  | CCNA_00291 | phosphate regulon sensor protein phoR               | 34           |                 |
| <i>ftsA</i>  | CCNA_02624 | cell division protein FtsA                          | 34           | yes             |
| <i>pdeA</i>  | CCNA_03507 | GGDEF/EAL phosphodiesterase PdeA                    | 32           |                 |
| <i>mreB</i>  | CCNA_01612 | rod shape-determining protein MreB                  | 30           |                 |
| <i>ftsH</i>  | CCNA_03334 | cell division protein FtsH                          | 18           | yes             |
| -            | CCNA_02080 | Sec-independent protein translocase protein tatC    | 9            |                 |
| <i>gcrA</i>  | CCNA_02328 | cell cycle regulatory protein GcrA                  | 4            | yes             |
| <i>dnaE</i>  | CCNA_02003 | DNA polymerase III alpha subunit                    | 4            |                 |
| <i>cheYI</i> | CCNA_00441 | chemotaxis receiver domain protein cheYI            | 419          | yes             |
| <i>flgH</i>  | CCNA_02145 | flagellar L-ring protein flgH                       | 103          | yes             |
| <i>socB</i>  | CCNA_03629 | DNA replication inhibitor toxin SocB                | 95           |                 |
| <i>CcnA</i>  | CCNA_R0094 | CcnA                                                | 253          |                 |
| <i>socA</i>  | CCNA_03630 | antitoxin protein SocA                              | 176          |                 |
| -            | CCNA_02425 | non-essential pilus assembly protein                | 133          | yes             |
| <i>flgL</i>  | CCNA_00942 | flagellar hook-associated protein FlgL              | 121          | yes             |
| <i>hfaB</i>  | CCNA_02712 | holdfast attachment protein hfaB                    | 85           | yes             |
| <i>cheAI</i> | CCNA_00442 | chemotaxis histidine kinase protein cheAI           | 59           | yes             |
| <i>tipF</i>  | CCNA_00747 | factor TipF                                         | 38           |                 |
| -            | CCNA_02762 | DNA repair protein RadC                             | 37           |                 |
| <i>parA</i>  | CCNA_03869 | chromosome partitioning protein ParA                | 35           |                 |
| <i>fliJ</i>  | CCNA_01527 | flagellin fljL                                      | 4            | yes             |

Figure 2. CcnA binds in vivo the mRNAs of *ctrA* and *gcrA* as revealed by MAPS. A. MAPS (MS2 Affinity Purification high-throughput Sequencing) technique requires the fusion of the sRNA sequence with a RNA tag MS2. This tag has affinity for the protein MS2, which is fused to the protein maltose binding protein (MBP) that allows the binding to an amylose column. The expression of *ms2-ccnA* in the *Caulobacter* cells permits the formation of mRNAs-CcnA complexes that are then trapped on the amylose column. RNAs are then sequenced by RNAseq. B. Results of MAPS using MS2-CcnA in comparison with non-tagged CcnA (neg). Genes under the control of CtrA are also listed in the last column.

139 CtrA must be phosphorylated in order to perform its functionality. Phostag technique was used, as  
140 previously described (Pini et al., 2013) to quantify the levels of CtrA~P upon induction of CcnA  
141 (Figure 1F). The analysis revealed that the higher level of CtrA in fact corresponds to high amount of  
142 CtrA~P. As phosphorylation of CtrA is under the control of the phosphorelay CckA and ChpT we  
143 tested whether levels ChpT were affected. We used YFP translational fusion of ChpT in order to  
144 understand whether CcnA ectopic expression was causing a change in the protein levels.  
145 Epifluorescent microscopy was used to quantify the protein level of ChpT fused with YFP and  
146 expressed by its native promoter (Figure S4A). Data were further analyzed by MicrobeJ (see Mat &  
147 Met) and results showed that upon CcnA induction intensity and clustering of the signal increases in  
148 the ChpT-YFP strain (Figure S4B). We quantified this variation as illustrated in figure S4C.

149 Rapid accumulation of CtrA corresponds also to a decrease of GcrA levels. Therefore we also  
150 quantified whether CcnA was at the same time affecting the protein level of GcrA using western blot  
151 and anti-GcrA antibodies. Surprisingly the quantification of GcrA upon CcnA induction revealed a  
152 significant decrease of the protein level (Figure 1E).

153 In conclusion CcnA increased expression induces a decrease of GcrA and an increase of CtrA protein,  
154 specifically in its phosphorylated form. These changes in the GcrA and CtrA levels may explain the  
155 cell cycle defects observed at the morphological levels, notably increase of cell length, long stalks and  
156 presence of significant proportion of swarmer cells even in stationary phase (data not shown).

157

### 158 **Knock-out of CcnA by chromosomal deletion and antisense silencing**

159

160 The gene *ccnA* belongs to the origin of replication (Figure S5); therefore, its sequence, at least  
161 partially, may play an essential role in the initiation of replication. We attempted a complete deletion  
162 of the *ccnA* sequence by two-step recombination (see Mat & Met) as previously described (Skerker et  
163 al., 2005) in presence of an inducible copy of *ccnA* or in the wild type background. As expected the  
164 deletion of the *ccnA* sequence was not successful demonstrating that the sequence of *ccnA* is essential.  
165 Same results were obtained also using the inducible copy of *ccnA*.

166 We decided to attempt different strategies allowing the inactivation of CcnA but keeping intact (most  
167 of) the origin of replication. First we attempted the deletion of the promoter region including the CtrA  
168 box putatively involved in *ccnA* transcription and, if successful, extending the deletion region into the  
169 *ccnA* sequence. Several deletion cassettes (see Mat & Met) were prepared and used as previously  
170 described for the complete deletion of *ccnA*. In order to minimize the effect of polar interference by  
171 the tetR cassette we also created marker-less deletions.

172 An alternative strategy was used by overexpression of the antisense of *ccnA* (CcnAas). CcnAas was  
173 fused to an IPTG-inducible promoter and its induction was tested in order to demonstrate a negative  
174 effect on CcnA activity.

175 The expression of the antisense of CcnA is able to induce the opposite effect than the overexpression  
176 of CcnA, that is increasing GcrA levels and decreasing CtrA levels (Figure 1C, D, E). Those results  
177 strongly suggested that the expression of the antisense is able to inactivate CcnA activity and then  
178 allowing the analysis of a CcnA loss of function. If the inactivation is complete, this result also  
179 suggests that the inactivation of CcnA is not lethal. Supported by these results we attempted a more  
180 specific deletion of *ccnA* on the chromosome by targeting its promoter region including the predicted  
181 CtrA box. As shown in the previous section the *ccnA* expression should be strictly under the control of  
182 CtrA, therefore the deletion of its box in the promoter region should have a mild or absent effect on  
183 the origin but impair the expression of the ncRNA. Results showed that the marker less deletion of the  
184 promoter of CcnA was viable but showing a severe growth defect (data not shown).

185 In conclusion both overexpression and low levels of CcnA show coherent results that suggest that  
186 CcnA is indeed responsible for the activation of CtrA and the downregulation of GcrA. However we  
187 asked whether this activity was due to a direct interaction of CcnA with the mRNAs of both gene and  
188 moreover whether other genes were targeted by this ncRNA.

189

### 190 **MS2 Affinity Purification high-throughput Sequencing (MAPS)**

191 In order to characterize RNAs that were targeted *in vivo* by CcnA and confirm whether CtrA and  
192 GcrA mRNAs were indeed targets of CcnA, we performed the technique called MAPS (MS2 Affinity  
193 Purification high-throughput Sequencing) as previously described (Lalaouna et al., 2017) (Figure 2A).

## Figure 3

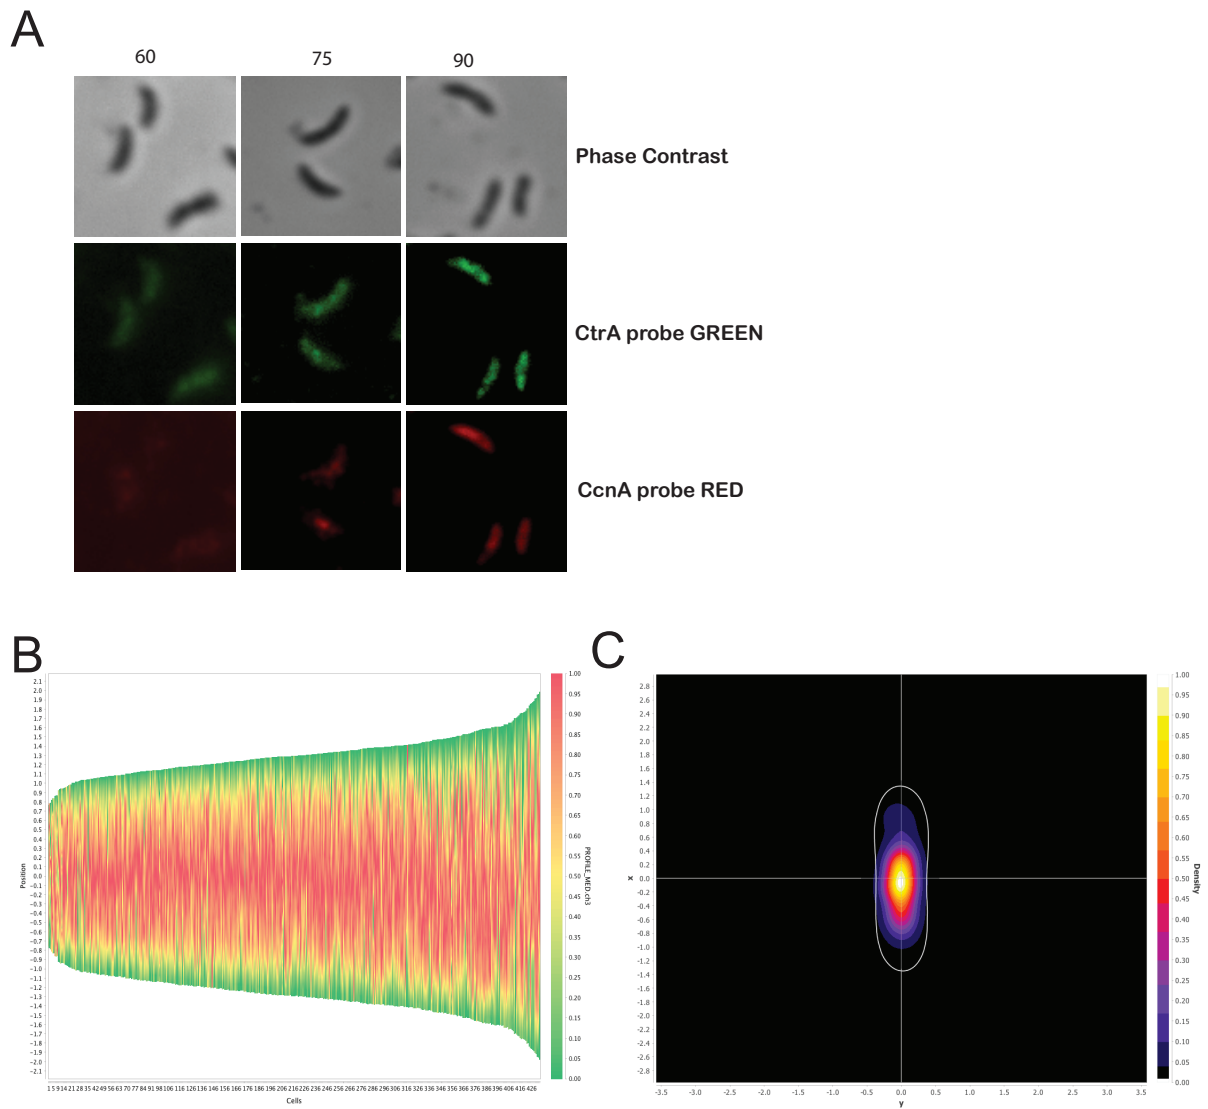

Figure 3. CcnA shows subcellular localization in late predivisinal cells. A. FISH (Fluorescent in situ hybridization) was used to visualize CcnA (red) and CtrA (green) RNAs in *Caulobacter* cells. A population was synchronized and time points were recovered every 15 minutes. CcnA signal is undetectable until 60 minutes of the cell cycle (early S-phase) (panels not shown), starting to increase until 90 minutes as shown by q-RT-PCR (Figure 1A). B. At 90 minutes of the cell cycle CcnA signal is at the highest level. In order to quantify precisely the localization of CcnA in predivisinal cells, ca. 500 cells were analyzed by MicrobeJ and the signal distribution was plotted longitudinally. As clearly showed, cells present a more intense signal in the mid cell region. C. These results were plotted in a single cell showing a clear mid cell localization.

194 We constructed a version of CcnA tagged with an MS2 RNA tag able to bind the protein MS2-MBP  
195 trapped in an amylose column. As a negative control the same version was cloned without tagging in  
196 order to compare results presumably specific to the MS2 technique. Strains expressing *ms2-ccnA* or  
197 *ccnA* were grown in exponential phase and *ms2-ccnA/ccnA* induced by IPTG for half an hour. Cells  
198 were lysed and soluble cell content was loaded onto an amylose column containing MS2-MBP fusion.  
199 RNA molecules and proteins were separated and purified as previously described (see Mat & Met).  
200 RNAs trapped in the amylose column in presence of *ms2-ccnA* or non-tagged CcnA were  
201 characterized by RNAseq and results were analyzed (see Mat & Met). Among other targets, the  
202 region mRNA of CtrA and GcrA were detected (Figure 2B). This result consistently supports our  
203 previous findings that CcnA mutations were indeed affecting CtrA and GcrA expression. The extent of  
204 CcnA regulated targets is wider than just *ctrA* and *gcrA* mRNAs. As illustrated in figure 2, other  
205 mRNAs are targeted by CcnA. A general observation of genes controlled by CcnA is that most of  
206 them generally belong to the CtrA regulon, such as motility genes.  
207 We also tagged UTR regions of *ctrA* (mRNAs generated by the promoter P1 or promoter P2), and  
208 *dnaA* (as a putative negative control) in order to confirm (or exclude) interactions with CcnA. If CcnA  
209 really interacts with *ctrA* P1 and P2 UTR regions but it doesn't bind the UTR of *dnaA*, this reverse-  
210 MAPS should be able to confirm the specific interaction. We expressed the MS2 tagged UTR regions  
211 in *C. crescentus* cells, comparing results with MAPS using a wild type strains and strains expressing  
212 non-tagged UTRs (see Mat & Met). We looked for the presence of CcnA (Data not shown)  
213 demonstrating that only the mRNA of the UTR region of CtrA corresponding to the P2 promoter is  
214 able to recover CcnA.

215

#### 216 **Fluorescent in situ hybridization (FISH) of CcnA and CtrA mRNA**

217

218 Aiming to understand the expression dynamics of CcnA during cell cycle and visualize the subcellular  
219 localization of CcnA and its target CtrA mRNA, we used Fluorescent *in Situ* hybridization (FISH) to  
220 image RNAs in the cells. Probes for CcnA and CtrA mRNA were designed and labeled with different  
221 fluorochromes (see Mat & Met). First, we synchronized a population of *Caulobacter* and visualized  
222 CcnA and CtrA mRNA every 15 minutes of the cell cycle in rich medium until 90 min (Figure 3).  
223 Results for CcnA (Figure 3) are perfectly matching with qPCR data (Figure 1A) increasing after 60  
224 minutes and reaching a high level around 90 minutes of the cell cycle that corresponds to a late  
225 predivisional stage (Figure 3A). The increased level of CcnA RNA and its accordance to qPCR levels  
226 strongly support the specificity of the probe. CtrA mRNA levels are also changing over the cell cycle  
227 with a similar dynamics accordingly to previous results (Laub et al., 2000; Reisenauer and Shapiro,  
228 2002; Reisenauer et al., 1999).

229 Surprisingly CcnA RNA showed a clear diffused midcell localization (Figure 3B) at 90 min that may  
230 suggest a condensation in this area as its levels increase and presumably the target RNA also  
231 increases. It's fascinating to speculate that the localization factor for CcnA is the presence of multiple  
232 copies of target mRNAs in that region of the predivisional cell.

233 We also tested FISH on the strains expressing high levels of CcnA (as showed in previous figures) as  
234 showed by qPCR. Accordingly, to high RNA levels the signal of the CcnA probe is considerably  
235 higher than in wild type cells and remarkably showing a patchy diffused level of CcnA RNA (data not  
236 shown).

237

#### 238 **Modulations of CcnA are able to complement mutants of cell cycle**

239

240 As methylation sites are connected to *ctrA* transcription by its own P1 promoter, we asked whether the  
241 expression of CcnA was also interacting genetically with the delta-*ccrM* mutant (Murray et al., 2013).  
242 We introduced *Plac-ccnA* and *Plac-ccnAas* in the CcrM mutant and analyzed the phenotypes. First we  
243 were not able to stably introduce CcnA antisense into delta-*ccrM* suggesting an incompatibility  
244 between the two genetic constructions. The expression of CcnA was indeed able to completely  
245 suppress the sick phenotype of the delta-*ccrM* mutant (Figure 4B). Notably the severe morphological  
246 defects of delta-*ccrM* were rescued (Figure 4B, C) as well as the motility defect (Figure 4D). We  
247 asked whether in the CcrM deletion background CcnA was indeed able to increase CtrA levels (Figure  
248 4F). Results clearly showed that CcnA is able to increase CtrA levels in the delta-*ccrM* mutant and



Figure 4

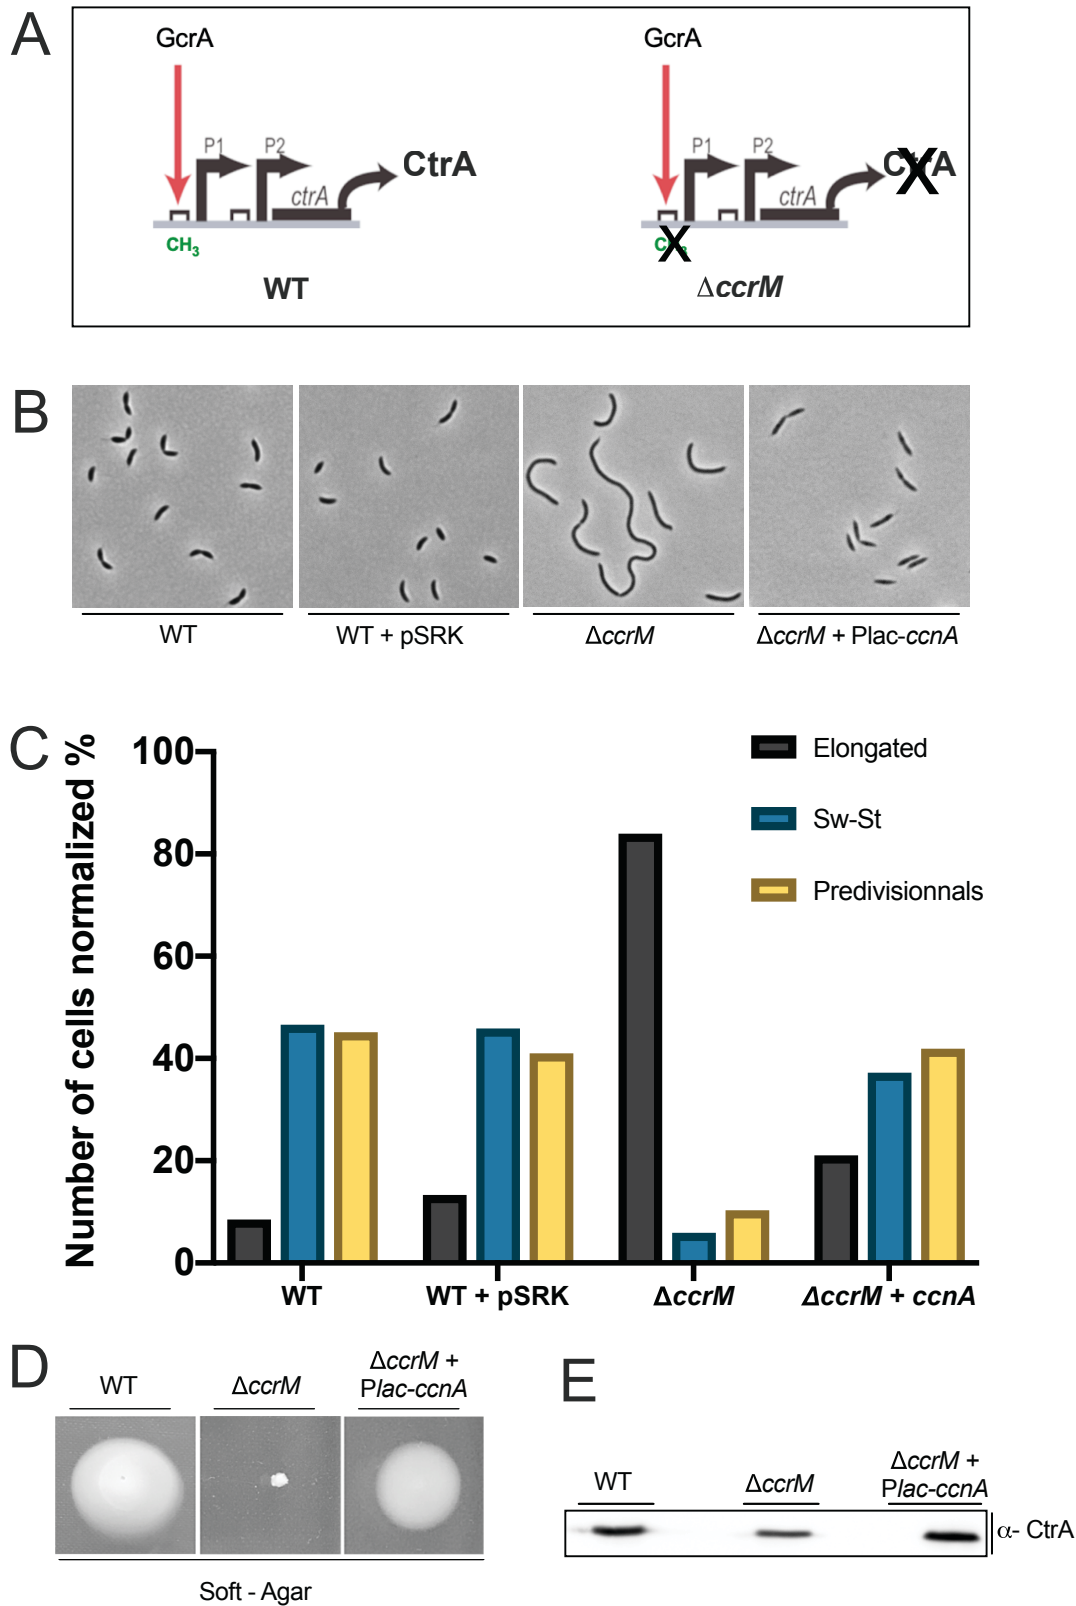

Figure 4. CcnA rescues the CcrM loss of function phenotype. A. Regulatory mechanism of P1 promoter activation by GcrA and CcrM methylation in wild type (WT) and  $\Delta ccrM$ . The absence of CcrM causes a loss of the methylation at the P1 promoter, decreasing the affinity of GcrA for the promoter region. B. Phase contrast microscopy of wild type (WT), a strain with the empty vector (WT + pSRK),  $\Delta ccrM$  and  $\Delta ccrM$  with the plasmid expressing CcnA ( $\Delta ccrM + ccnA$ ). C. Quantification of morphological types in different genetic backgrounds. D. Complete suppression of the motility defect of  $\Delta ccrM$ . E. Western blotting using CtrA antibodies in WT,  $\Delta ccrM$  and  $\Delta ccrM$  expressing CcnA.

249 that indeed the mechanism by which CcnA increases CtrA protein levels is independent from CcrM,  
250 so presumably acting on the P2 promoter.

251 Supported by the results, we also decided to combine mutants of CcnA with  $\Delta pleC$ , a mutant involved  
252 in the negative control of DivK phosphorylation level. As DivK~P inhibits CtrA stability and activity,  
253 in the deletion mutant of DivK phosphatase, PleC, CtrA levels are extremely low (Figure 5A).  
254 Therefore high CcnA activity should compensate the PleC deletion mutant's defects, restoring the  
255 wild type phenotypes.

256 We introduced *Plac-ccnA* or *Plac-ccnAas* in  $\Delta pleC$  mutant and observe the morphology, motility in  
257 soft agar plates, sensitivity to the phage CbK and stalk length (Figure 5).

258 The expression of CcnA was able to rescue  $\Delta pleC$  defects, restoring stalks and motility while the  
259 expression of the CcnA antisense caused a very severe phenotype (Figure 5B, C). We asked whether  
260 this suppression was just increasing the level of CtrA or it was indeed able also to affect the  
261 phosphorylation of CtrA. We measured CtrA~P by Phos-Tag technique (Figure 5D). This analysis  
262 revealed that CcnA was indeed able to increase the CtrA~P levels in  $\Delta pleC$ .

263 Finally we measured the sensitivity to the phage CbK, which is entering the cells by attachment to the  
264 pili structures (Figure 5E). As the main subunit PilA of the pilus is completely under the control of  
265 CtrA, a mutant of PleC completely lacks of pili and therefore it is resistant to CbK infection (Panis et  
266 al., 2012; Sommer and Newton, 1988). Results showed that the expression of CcnA was completely  
267 able to restore the sensitivity to CbK at the levels of wild type while the expression of CcnA antisense  
268 did not change the resistance to the phage infection of the *pleC* mutant (Figure 6). Finally we  
269 measured the stalk length of the  $\Delta pleC$  in which we expressed CcnA (Figure 5F). The expression of  
270 CcnA indeed restores the stalk production (absent in  $\Delta pleC$ ), while the expression of the antisense  
271 does not.

272

### 273 **CcnA interacts *in vitro* with the mRNAs of CtrA, GcrA and DnaA**

274

275 In order to understand the molecular bases of CcnA-CtrA interactions we performed Probing  
276 experiments using *ctrA* (promoters P1 and P2), *gcrA* and *dnaA* UTR regions. MAPS and molecular  
277 analysis revealed a putative interaction between CcnA and CtrA/GcrA mRNAs, while the interaction  
278 with the UTR region of *dnaA* was only predicted (Beroual et al., 2018), but no *in vivo* link was found  
279 and therefore we included as a negative control.

280 CtrA UTR region was analyzed considering the two Transcription start sites (TSS), P1 and P2,  
281 controlled by GcrA/CcrM methylation and CtrA, respectively. For GcrA we used data derived from 5'  
282 race experiments at the genome scale (Zhou et al., 2015). Results showed regions of protection for  
283 both CtrA UTR from the promoter P1 and the promoter P2 (Figure 6). They both share most of the  
284 annealing regions except for an extra distal region in P1 that is in fact outside the P2 UTR. A common  
285 element of annealing was found looking into the GcrA UTR region annealing with CcnA. A stretch of  
286 CCCC, present in a loop region of CcnA, is also protecting both CtrA and GcrA UTR regions.  
287 Regarding DnaA that was previously predicted to be the real target of CcnA (Beroual et al., 2018),  
288 Probing experiments indeed showed a clear protection that corresponded to the predicted region  
289 (Figure 6). Whether this interaction is real or not, we can speculate that (i) CcnA and *dnaA* mRNA are  
290 not usually expressed at the same time; (ii) MAPS did not revealed any interaction between CcnA and  
291 the UTR region of DnaA; (iii) None of phenotypes of the loss or overexpression of CcnA are  
292 physiologically connected to DnaA. Therefore we excluded that CcnA binds DnaA during the cell  
293 cycle. However it's possible that this interaction becomes relevant during a specific response in which  
294 the expression of CcnA is indeed directed to DnaA regulation. Moreover we cannot exclude that the  
295 UTR region of *dnaA* is indeed inversely regulating CcnA.

296 In order to consolidate these observations we decided to check whether the CtrA UTR region was  
297 indeed able to bind CcnA using a reverse MAPS in which the mRNA of *ctrA* was tagged with MS2.  
298 Results clearly showed that CcnA appears among targets of *ctrA* UTR reinforcing the discovery of the  
299 CcnA-CtrA mRNA interaction. As a putative negative control (based on westerns on DnaA that  
300 showed no variation at the protein level) we also tested the UTR region of DnaA tagged with MS2.  
301 Although this region is able to bind CcnA *in vitro* (Figure 6), by using an *in vivo* MAPS technique, we  
302 were not able to detect any interaction with DnaA mRNA suggesting that in normal physiological

## Figure 5

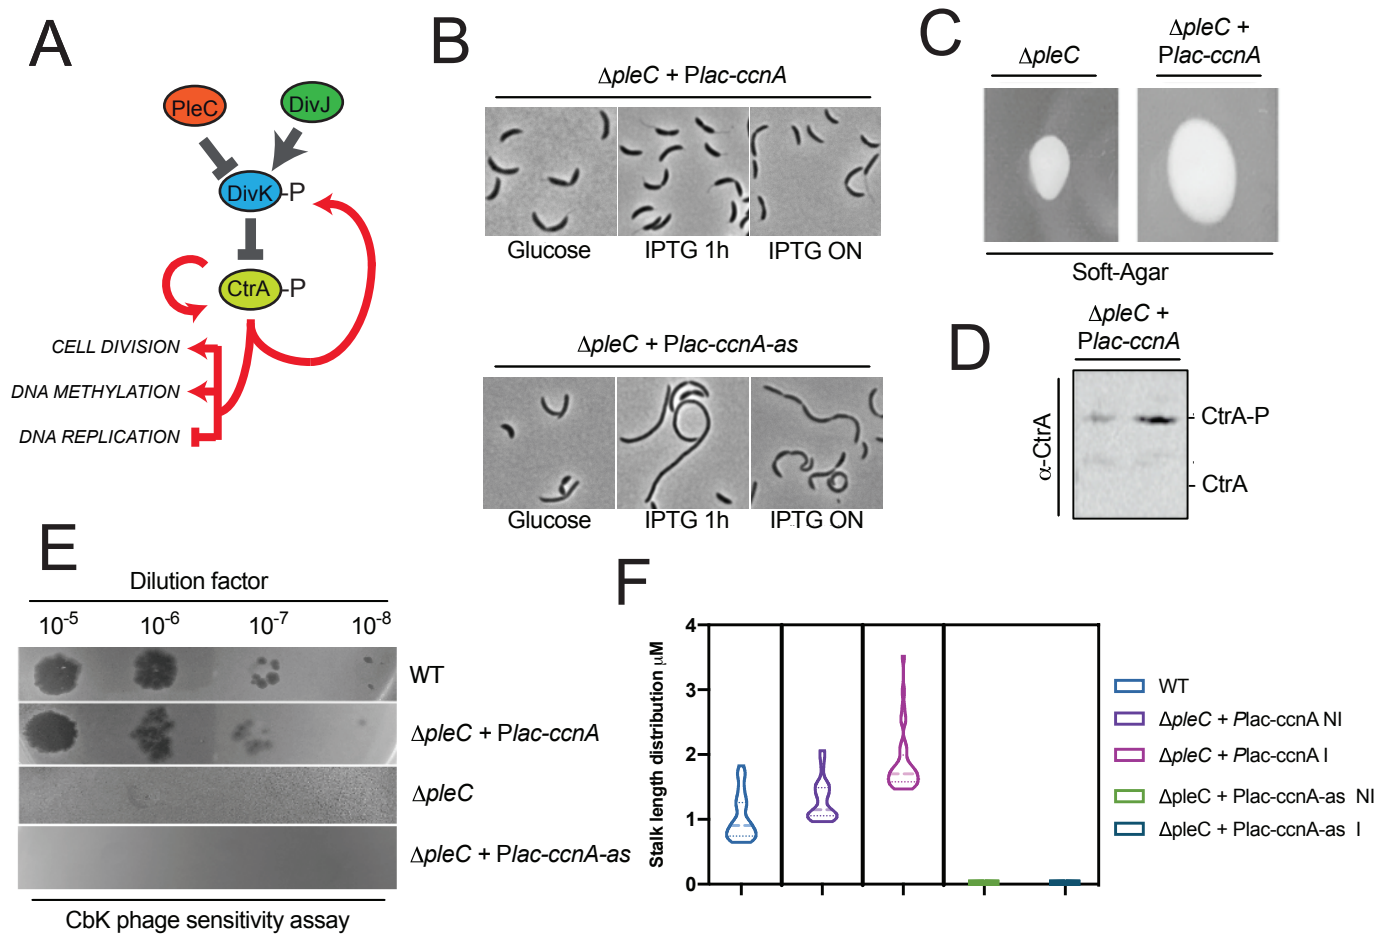

Figure 5. CcnA rescues the pleiotropic phenotypes of  $\Delta pleC$ . A. Schematics of CtrA-DivK negative feedback loop. DivK phosphorylation levels are controlled by the kinase DivJ and the phosphatase PleC. Absence of PleC causes a decrease of CtrA, both at the protein and phosphorylation levels. B. Phase contrast microscopy of the  $\Delta pleC$  mutant expressing CcnA ( $\Delta pleC + Plac-ccnA$ ) and its antisense ( $\Delta pleC + Plac-ccnA-as$ ) in glucose (G) and IPTG 1h and IPTG overnight (IPTG ON). C. Soft agar assay using  $\Delta pleC$  and  $\Delta pleC$  expressing CcnA. D. Phos-tag gel measuring the levels of CtrA~P in the  $\Delta pleC$  background expressing CcnA in glucose and IPTG (1h). E. Infection by the phage CbK in different backgrounds, wild type (WT),  $\Delta pleC$ ,  $\Delta pleC$  mutant expressing CcnA ( $\Delta pleC + Plac-ccnA$ ) and its antisense ( $\Delta pleC + Plac-ccnA-as$ ). F. Measures of stalk length using BacStalk.

303 conditions CcnA is not interacting with DnaA mRNA. This result is also compatible with the  
304 observation that CcnA exists in the cell in the second half of the S-phase in which no role of DnaA has  
305 never been described.

306 Based on these results we constructed mutant versions of CcnA in which the two active loops  
307 “CCCC” (Loop A) and “ATCAA” (Loop B) were individually mutated or introduced together in the  
308 CcnA sequence (Figure 7A). These mutated versions of CcnA were then tested *in vivo* using the same  
309 expression system that was used before as shown in figure 1. These mutant versions were expressed in  
310 *C. crescentus* and results are reported in figure 7B as a series of dilutions. The mutation of the site  
311 “CCCC” is already able to abolish completely the sick phenotype of CcnA overexpression, while the  
312 mutation of the Loop B in which growth of *C. crescentus* cells is similar to the over CcnA strain.  
313 These results suggest that the sick phenotype observed when inducing the WT version of CcnA is  
314 mainly due to the binding of the Loop A of CcnA to the mRNA.

315 We did test whether expressing mutant versions of CcnA was causing the same CtrA protein  
316 variations when expressing CcnA wild type (Figure 7C). Results showed that mutation of Loop A and  
317 both A and B do not show the same CcnA induction-dependent variation of CtrA. When we looked at  
318 the Western blotting results, the mutation of both loops is needed to restore a normal amount of CtrA  
319 in comparison with the WT strain. However the over expression of the version mutated of the Loop A  
320 still induces an increase of CtrA. This suggests also that the presence of the non-mutated Loop B alone  
321 is still able to increase CtrA.

322

### 323 **Conservation of CcnA among alphas**

324

325 Considering the key role of CcnA in *Caulobacter* coordinating two of the principal master regulators  
326 of cell cycle, we asked whether its function was conserved in bacteria that share the regulatory  
327 mechanisms. We considered a well known bacterial model, *Sinorhizobium*, a symbiotic nitrogen fixing  
328 organism. *S. meliloti* shares with *Caulobacter* most of the regulatory circuit driving cell cycle  
329 including CtrA (Pini et al., 2013, 2015). Therefore we took advantage of the inducible system we used  
330 for *Caulobacter*, which is also working in the *Sinorhizobium* (Khan et al., 2008). We electroporated *S.*  
331 *meliloti* with a plasmid containing *Caulobacter* CcnA. Expressing CcnA from *Caulobacter* slowed the  
332 growth of *S. meliloti* and caused an abnormal morphology (Figure 8B). We therefore asked whether  
333 this alteration in cell morphology was due to a change in CtrA levels in comparison with a negative  
334 control (Figure 8C). Indeed results showed that CcnA of *C. crescentus* is able to induce a cell cycle  
335 defect, that is branched cells and a clear cell division retard, indeed similar to that observed in a delta-  
336 *divJ* mutant (Pini et al., 2013).

337 The activity of *Caulobacter* CcnA in these two alphaproteobacterial species suggested that a putative  
338 homologous gene should be present in *Sinorhizobium*. We therefore scanned the genomes of the  
339 alphaproteobacterial species using GlassGo (Lott et al., 2018) aiming to find CcnA homologs. We  
340 found a conservation of CcnA in several closely related species (Figure 8A).

341

# Figure 6

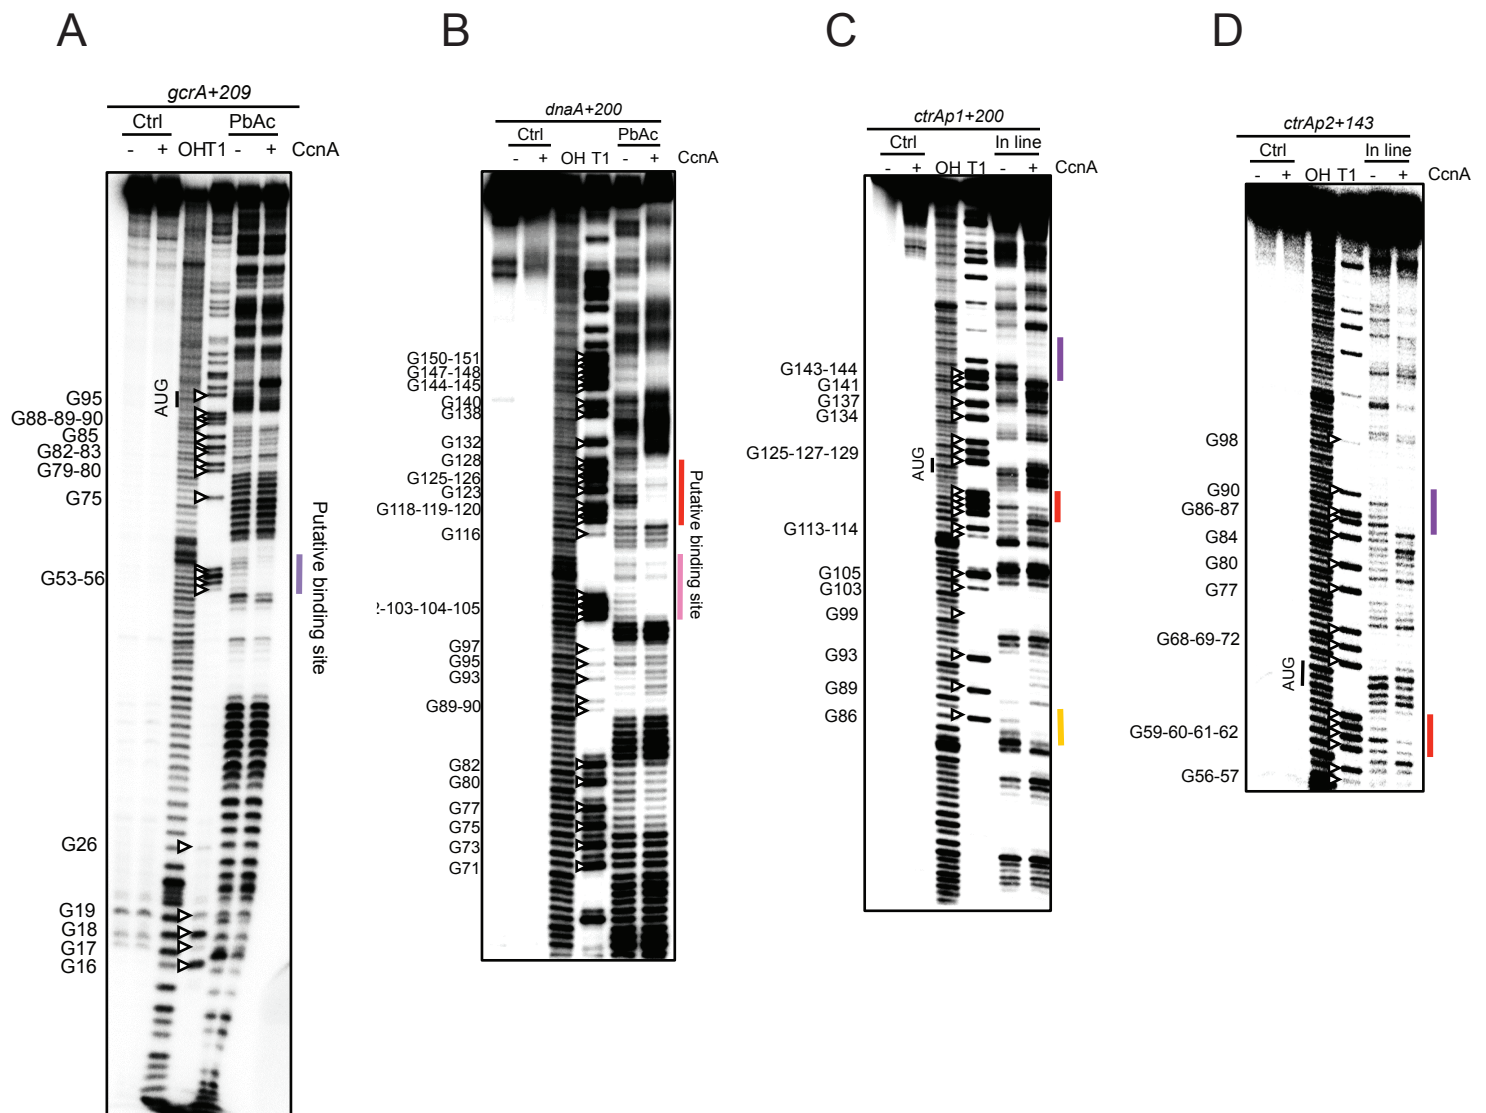

Figure 6. Probing of CcnA against *ctrA* P1 and P2, *dnaA* and *gcrA* UTR regions. A. Probing experiments (see Materials and Methods) were performed using a probe corresponding to the GcrA UTR. B. Probing experiments using a probe corresponding to the DnaA UTR. C. Probing experiments using a probe corresponding to the CtrA P1 UTR. D. Probing experiments using a probe corresponding to the CtrA P2 UTR.

## 342 Discussion

343 The origin of replication of *Caulobacter* chromosome represents one of the most important regions of  
344 the genome as it's absolutely necessary for replication of the genetic material and hence life. The  
345 origin itself may be empty of genes as its function was completely dedicated to DNA replication.  
346 However transcriptomic data revealed that some parts were transcribed; for example a short gene was  
347 present (CCNA\_R0094) and its sequence was essential as no transposition event was ever selected in a  
348 TnSeq approach (Christen et al., 2011; Schrader et al., 2014; Zhou et al., 2015). This gene is  
349 surrounded by CtrA boxes at -23 bp from the TSS and at the very end of the gene (Brilli et al., 2010).  
350 CtrA binding sites at the origin of replication play an inhibitory role on the replication of DNA as they  
351 allow CtrA~P to compete out the binding of DnaA (Frandi and Collier, 2019). Here we investigated  
352 the role of CcnA in controlling cell cycle. Its role has emerged as central in the regulation of two  
353 master regulators of cell cycle, CtrA and GcrA.

354 Using qPCR and FISH we clearly showed that CcnA starts accumulating in the second half of the S-  
355 phase coincidentally with CtrA itself being accumulated, presumably by the transcription driven by  
356 the CtrA promoter P1. We showed that the expression of *ccnA* depends on CtrA, as *ccnA* is one of the  
357 genes that are affected in the temperature sensitive allele of CtrA (Thr-170 to Ile). Once CcnA starts  
358 being accumulated, it binds *in vivo* (MAPS results) the mRNA of CtrA by at least two regions  
359 belonging to loops (Figure 7A), in particular Probing experiments showed that a stretch of CCCC is  
360 particularly active on target sequences, possibly stabilizing the interaction. We hypothesize that this  
361 binding of CcnA on CtrA UTR region causes a liberation of the RBS followed by an increase of  
362 protein levels. We predicted the structure of the UTR regions starting from the TSS of promoter P1  
363 and P2 of the gene *ctrA* with and without CcnA (Data not shown). At the pure prediction level it  
364 appears evident that the mRNA of CtrA has the RBS blocked in a stem region while binding of CcnA  
365 frees the RBS.

366 Examples of ncRNAs controlling and enhancing key functions can be found elsewhere (Fröhlich and  
367 Vogel, 2009), such as in *Pseudomonas stutzeri* A1501 with NfiS, a positive regulator of the  
368 Nitrogenase (Zhan et al., 2016). In this system, a compact ncRNA structure acts on the mRNA of *nifK*,  
369 encoding the  $\beta$ -subunit of the MoFe protein of the nitrogenase enzymatic complex, enhancing the  
370 translation.

371 Indeed CcnA plays a role in the regulation of the expression of CtrA as an activator of translation. The  
372 regulatory circuit created by CtrA-CcnA and back to CtrA represents a positive feedback loop in  
373 which the regulatory layer controlled by CcnA acts on top of a second layer of transcriptional auto-  
374 activation of CtrA on its second strong promoter P2. In parallel CtrA has an inhibitory activity on  
375 GcrA, creating a negative feedback loop in which GcrA activates CtrA that in turn blocks GcrA. CcnA  
376 acts as well on this feedback reinforcing a reduction of translation by direct binding onto the UTR  
377 region of GcrA. Therefore CcnA in principles doesn't create new connections between master  
378 regulators of cell cycle but in fact acts on a preexisting circuit increasing presumably the robustness of  
379 the system. This behavior by sRNAs has been described before (Dutta and Srivastava, 2018; Mandin  
380 and Guillier, 2013; Nitzan et al., 2017). The role of sRNAs therefore is to consolidate the robustness  
381 of transcriptional circuits by introducing a fast translational control on the mRNAs produced by  
382 transcription factors. From this point of view CcnA may indeed act as key trigger for protein  
383 production linking transcription to translation. The importance of CcnA emerges when redundant  
384 mechanisms of CtrA control are not present, such as the absence of GcrA (primary activator of CtrA  
385 expression in the second half of S-phase).

386 Is this CcnA dependent mechanism, controlled by CtrA itself, also conserved in organisms in which  
387 CtrA regulates cell cycle? We investigated *S. meliloti* where the role of CtrA has been investigated  
388 (Pini et al., 2013, 2015). In these two organisms CtrA is essential and controls key cell cycle functions  
389 such as cell division and DNA replication. Accordingly to our hypothesis the expression of  
390 *Caulobacter* CcnA causes the same molecular alterations as described here. Although more molecular

## Figure 7

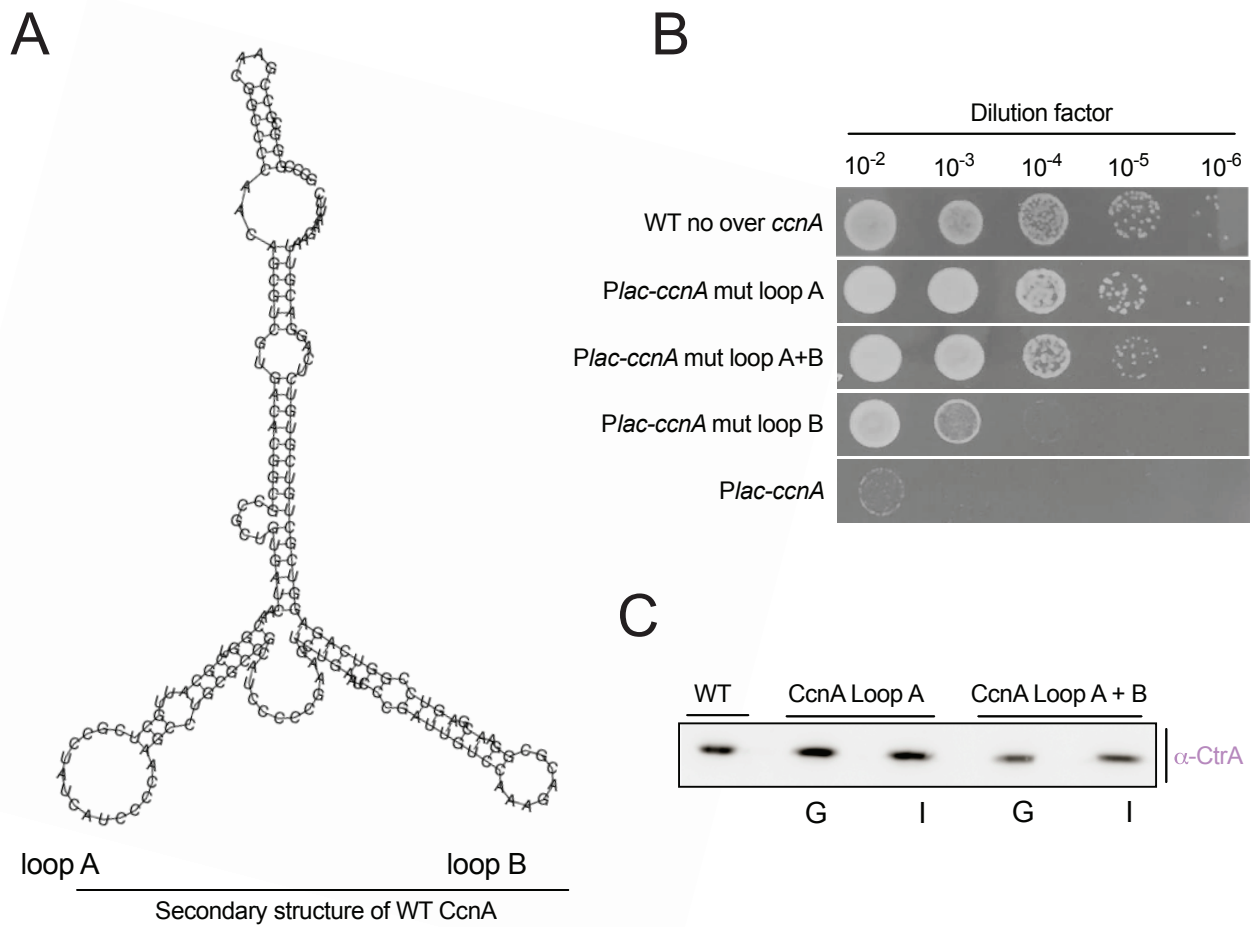

Figure 7. Mutation of loop regions of CcnA. A. Structure of CcnA, loops are marked as “Loop A” and “Loop B”. B. Expression of mutated CcnA sequences in comparison with wild type in wild type, as measured by dilution series. C. Western blotting anti-CtrA on strain expressing mutated versions of CcnA (with loopsA and A+B).

391 investigation of homologous ncRNAs in these organisms must be explored, we can easily conclude  
392 that CcnA activity may be indeed a conserved mechanism of the regulation of cell cycle. This new  
393 system of complex regulatory circuits carried out by CcnA indeed expand the key role of ncRNAs in  
394 bacteria opening a new crucial activity that will need a thorough molecular investigation of  
395 mechanistic activity of this Y-shaped RNA. The CcnA structure and consequent activity may be a new  
396 class of ncRNAs whose role is still at its beginning of study, presenting interesting structural  
397 similarities with tRNAs. Interestingly a prediction of target genes among several homologs have  
398 shown that targets usually falls into the chemotaxis and motility classes of genes suggesting a common  
399 function. This is not surprising considering that CtrA itself is considered in *Caulobacter* and most of  
400 alphaproteobacteria as a regulator of motility (Brilli et al., 2010; Greene et al., 2012).

401



# Figure 8

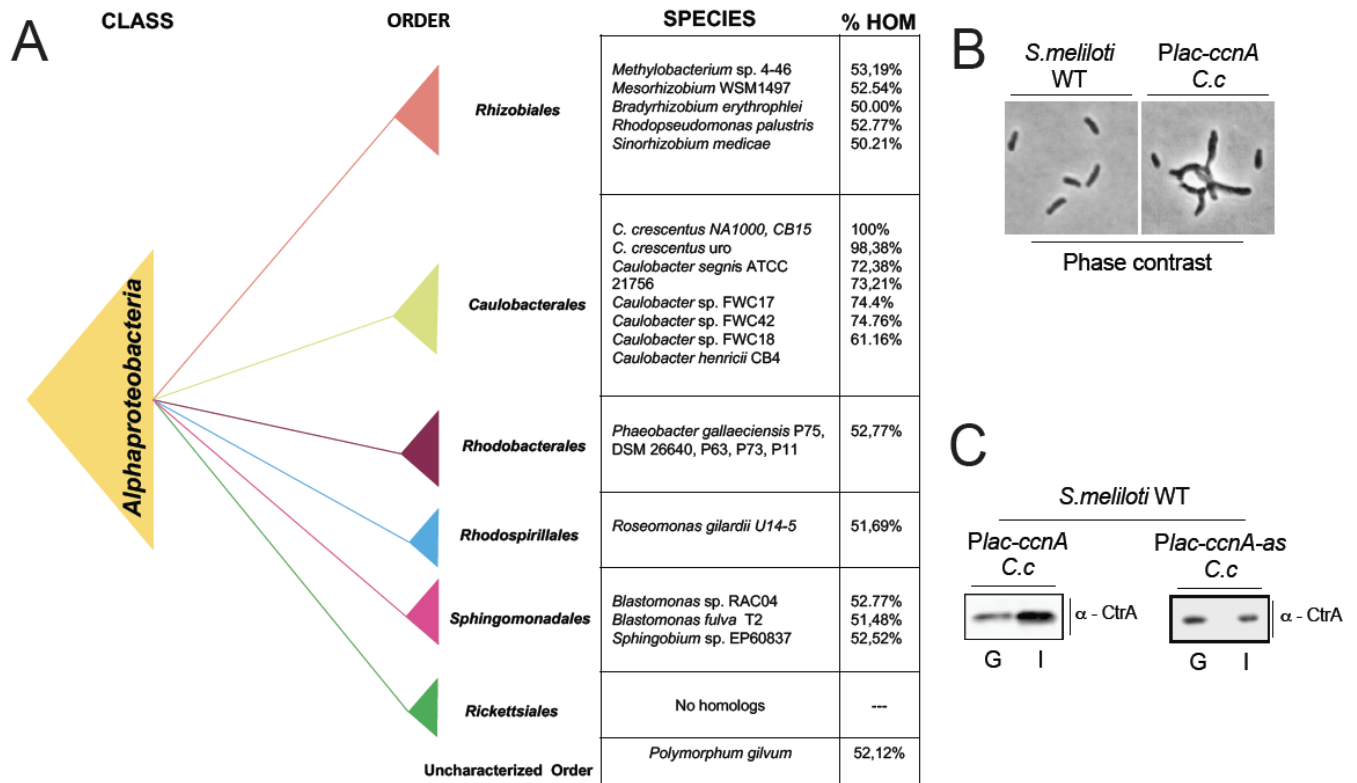

Figure 8. Conservation of CcnA among alphaproteobacterial species and expression of CcnA in *S. meliloti*. A. Homologs of CcnA in several species of the class *Alphaproteobacteria*. B. Expression of CcnA from *C. crescentus* (*C. c.*) causes a severe cell cycle defect upon induction. C. Western blotting against CtrA shows that expression of *C. crescentus* CcnA induces an increase of CtrA levels in *S. meliloti* while its antisense has no effect.

## 402 **Materials and Methods**

### 403 **Strains and growth conditions**

404 *Caulobacter* strains were routinely cultured in peptone-yeast extract (PYE) medium with appropriate  
405 amount of antibiotics (Kanamycin 25 µg/ml, Tetracycline 2 µg/ml) and 0.3% xylose or 0.2% glucose  
406 whenever necessary. The cultures were grown at 30°C or 37°C as required for different experiments.  
407 Synchronization of the *Caulobacter* cells was done using Percoll or Ludox as described before (Marks  
408 et al., 2010). *E. coli* strains were grown at 37°C in LB broth or solid medium with required amount of  
409 antibiotic supplements (Ampicillin 100 µg/ml, Kanamycin 50 µg/ml, Tetracycline 10 µg/ml) as  
410 necessary. *Caulobacter* cells were transformed with different plasmids by electroporation.

### 411 **MAPS**

412 MAPS has been performed as previously described (Lalaouna et al., 2017).

### 413 **RNAseq**

414 Cultures were harvested at 0.6 DO600 and frozen in liquid nitrogen as previously described (Pini et  
415 al., 2015). Total RNA was prepared using RNeasy Mini Kit (Qiagen). Ribosomal RNAs were  
416 removed using the Bacterial RiboZero (Illumina) and libraries for MiSeq (V3 cassette) were prepared  
417 using the Stranded True Seq RNAseq Kit (Illumina).

### 418 **Probing experiments**

419 Templates for in vitro probing, containing a T7 promoter, were obtained by PCR amplification. Lead  
420 acetate degradation and In-line probing assays were performed as previously described (Lalaouna et  
421 al., 2015). In brief, 0.2 µM of *in vitro*-generated *gcrA+209*, *dnaA+200*, *ctrAp1+200* and  
422 *ctrAp2+143*, 5' -end-labeled were incubated with or without 1µM CcnA sRNA. Radiolabeled RNA  
423 was incubated 5 min at 90°C with alkaline buffer or 5 min at 37°C with ribonuclease T1 (0.1 U;  
424 Ambion) to generate the Alkaline (OH) ladder and the T1 ladder, respectively. RNA was analyzed on  
425 an 8% acrylamide/7M urea gel.

### 426 **Microscopy analysis**

427 Cells were observed on a 24x50 mm coverslip under a 0.15% agarose-PYE “pad” to immobilize the  
428 cells. Samples were observed thanks to an epifluorescent-inverted microscope Nikon Eclipse TiE E  
429 PFS (100 x oil objective NA 1.45 Phase Contrast). Cells morphologies and fluorescent images were  
430 analysed using ImageJ and MicrobeJ (Ducret et al., 2016; Schneider et al., 2012).

### 431 **Fluorescent in situ Hybridization (FISH)**

432 RNA- experiments were conducted following the protocols described previously (Montero Llopis et  
433 al., 2010; Russell and Keiler, 2009) , with few modifications. The method is described as follows.  
434 *Caulobacter* cells grown up to mid-exponential phase or isolated from different stages of a  
435 synchronized population were fixed with 4% formaldehyde (in 1X PBS, pH 7.4) for 15 min at room  
436 temperature followed by 30 min on ice. Then cells were briefly centrifuged and supernatant removed.  
437 The pellet washed thrice with 1X PBS + 0.05% Tween 20, followed by once with 1X PBS. Cells  
438 resuspended in 1x PBS. To a clean and sterile cover slip (round ones) 10 µl poly-L-lysine (Sigma)  
439 applied and kept at room temperature for 10 min. Excess poly-L-lysine was removed with kim-wipes.  
440 For super resolution microscopy cells were spread on Super resolution coverslips. Then 10 µl of cell  
441 suspension was added and kept at room temperature for 10 min. Excess liquid removed with kim-  
442 wipes. To the coverslip with attached cells, 100 µl cold methanol (-20°C) was added and incubated for  
443 1 min. Methanol removed slowly with micropipette and then 100 µl of cold acetone (-20°C) was

444 added and kept for 30 seconds. Acetone was removed with micropipette. Coverslips were kept in open  
445 to become dry. Pre-hybridization and hybridization were set up in small petri dishes, each containing a  
446 single coverslip, and the petridishes were kept in a humidified chamber incubated at the required  
447 temperature. Pre-hybridization was done by adding 100  $\mu$ l of pre-hybridization buffer (40%  
448 formamide in 2X SSC) to each coverslip and incubating at 37°C for 1 hr. RNA-FISH probes (Table  
449 S5) for CcnA (CAL Fluor Red 610) or CtrA (Fluorescein) by Stellaris were mixed at 200  $\mu$ M  
450 concentration with 25  $\mu$ l of hybridization buffer I (2X SSC, 80% formamide, 70  $\mu$ g/ml Salmon Sperm  
451 DNA, 1 mg/ml E. coli tRNA) to a concentration 250 nM and heated at 65°C for 5 min, to which equal  
452 volume (25  $\mu$ l) of hybridization buffer II [2X SSC, 20% Dextran Sulfate, 10 mM Vanadium  
453 Ribonucleoside Complex (VRC) (NEB), 0.2% BSA, 40 U RNase Inhibitor] was added. 50  $\mu$ l of the  
454 hybridization buffer added to each coverslip and the whole humidified chamber was incubated at 37°C  
455 for overnight. Following the hybridization, the coverslips were washed twice, each for 15 min, with  
456 100  $\mu$ l of 50% formamide + 2X SSC solution. Then the coverslips were washed 5 times, each with  
457 100  $\mu$ l of 1X PBS for 1 min. The coverslips were mounted on 10  $\mu$ l of mounting medium (REF) on  
458 glass slides. The slide was kept at room temperature for at least 1 hr followed by 3-4 hrs at 4°C to  
459 stabilize the medium.

460

461 **Acknowledgments**

462 We thank Yann Denis of the Transcriptomic platform of IMM for qPCR analysis. We thank also  
463 Patrick Viollier for the phage CbK.

464 **Figure Legends**

465

466 **Figure 1. CcnA (Cell Cycle Non-coding RNA A) regulates cell cycle.** A. Levels of CcnA were  
467 compared to 16S by qRT-PCR. Samples from a synchronized population (see schematics below the  
468 plot) were isolated and RNA was extracted. On the same synchronized samples Phos-Tag anti-CtrA  
469 was performed measuring both protein and phosphorylation levels. B. A temperature sensitive allele of  
470 *ctrA* (CtrA401) was used to measure CcnA RNA levels at 30°C and 37°C. Expression of CcnA drops  
471 upon inactivation of CtrA. C. Phase contrast images of strains overexpressing CcnA (*Plac-ccnA*), its  
472 antisense (*Plac-ccnA-as*), wild type (WT) and the empty vector (pSRK-empty). D. Cultures of the  
473 strains of panel C were grown until 0,6 and grown at different dilutions. E. Western blots using anti-  
474 CtrA and anti-GcrA antibodies in *Plac-ccnA*, *Plac-ccnA-as* and empty vector using glucose and IPTG  
475 conditions (see M&M). Upon induction of CcnA, CtrA levels increase while they decrease when  
476 expressing the antisense of CcnA. For GcrA we observed the opposite situation, while the empty  
477 vector doesn't show any variation between glucose and IPTG. F. Phos-tag gel anti-CtrA of the strain  
478 *Plac-ccnA* in comparison with the strain containing the empty vector in glucose and IPTG conditions.

479

480 **Figure 2. CcnA binds *in vivo* the mRNAs of *ctrA* and *gcrA* as revealed by MAPS.** A. MAPS (MS2  
481 Affinity Purification high-throughput Sequencing) technique requires the fusion of the sRNA  
482 sequence with a RNA tag MS2. This tag has affinity for the protein MS2, which is fused to the protein  
483 maltose binding protein (MBP) that allows the binding to an amylose column. The expression of *ms2-*  
484 *ccnA* in the *Caulobacter* cells permits the formation of mRNAs-CcnA complexes that are then trapped  
485 on the amylose column. RNAs are then sequenced by RNAseq. B. Results of MAPS using MS2-CcnA  
486 in comparison with non-tagged CcnA (neg). Genes under the control of CtrA are also listed in the last  
487 column.

488

489 **Figure 3. CcnA shows subcellular localization in late predivisional cells.** A. FISH (Fluorescent in  
490 situ hybridization) was used to visualize CcnA (red) and CtrA (green) RNAs in *Caulobacter* cells. A  
491 population was synchronized and time points were recovered every 15 minutes. CcnA signal is  
492 undetectable until 60 minutes of the cell cycle (early S-phase), starting to increase until 90 minutes as  
493 shown by q-RT-PCR (Figure 1A). B. At 90minutes of the cell cycle CcnA signal is at the highest  
494 level. In order to quantify precisely the localization of CcnA in predivisional cells, ca. 500 cells were  
495 analyzed by MicrobeJ and the signal distribution was plotted longitudinally. As clearly showed, cells  
496 present a more intense signal in the mid cell region. C. These results were plotted in a single cell  
497 showing a clear mid cell localization.

498

499 **Figure 4. CcnA rescues the CcrM loss of function phenotype.** A. Regulatory mechanism of P1  
500 promoter activation by GcrA and CcrM methylation in wild type (WT) and  $\Delta ccrM$ . The absence of  
501 CcrM causes a loss of the methylation at the P1 promoter, decreasing the affinity of GcrA for the  
502 promoter region. B. Phase contrast microscopy of wild type (WT), a strain with the empty vector (WT  
503 + pSRK),  $\Delta ccrM$  and  $\Delta ccrM$  with the plasmid expressing CcnA ( $\Delta ccrM + ccnA$ ). C. Quantification of  
504 morphological types in different genetic backgrounds. D. Complete suppression of the motility defect  
505 of  $\Delta ccrM$ . F. Western blotting using CtrA antibodies in WT,  $\Delta ccrM$  and  $\Delta ccrM$  expressing CcnA.

506

507 **Figure 5. CcnA rescues the pleiotropic phenotypes of  $\Delta pleC$ .** A. Schematics of CtrA-DivK negative  
508 feedback loop. DivK phosphorylation levels are controlled by the kinase DivJ and the phosphatase  
509 PleC. Absence of PleC causes a decrease of CtrA, both at the protein and phosphorylation levels. B.  
510 Phase contrast microscopy of the  $\Delta pleC$  mutant expressing CcnA ( $\Delta pleC + Plac-ccnA$ ) and its  
511 antisense ( $\Delta pleC + Plac-ccnA-as$ ) in glucose (G) and IPTG 1h and IPTG overnight (IPTG ON). C.  
512 Soft agar assay using  $\Delta pleC$  and  $\Delta pleC$  expressing CcnA. D. Phos-tag gel measuring the levels of  
513 CtrA~P in the  $\Delta pleC$  background expressing CcnA in glucose and IPTG (1h). E Infection by the phage  
514 CbK in different backgrounds, wild type (WT),  $\Delta pleC$ ,  $\Delta pleC$  mutant expressing CcnA ( $\Delta pleC + Plac-$   
515 *ccnA*) and its antisense ( $\Delta pleC + Plac-ccnA-as$ ). F. Measures of stalk length using BacStalk.

516 **Figure 6. Probing of CcnA against *ctrA* P1 and P2, *dnaA* and *gcrA* UTR regions.** A. Probing  
517 experiments (see Materials and Methods) were performed using a probe corresponding to the GcrA  
518 UTR. B. Probing experiments using a probe corresponding to the DnaA UTR. C. Probing experiments  
519 using a probe corresponding to the CtrA P1 UTR. D. Probing experiments using a probe  
520 corresponding to the CtrA P2 UTR.  
521

522 **Figure 7. Mutation of loop regions of CcnA.** A. Structure of CcnA, loops are marked as “Loop A”  
523 and “Loop B”. B. Expression of mutated CcnA sequences in comparison with wild type in wild type,  
524 as measured by dilution series. C. Western blotting anti-CtrA on strain expressing mutated versions of  
525 CcnA (with loopsA and A+B).  
526

527 **Figure 8. Conservation of CcnA among alphaproteobacterial species and expression of CcnA in**  
528 ***S. meliloti*.** A. Homologs of CcnA in several species of the class *Alphaproteobacteria*. B. Expression  
529 of CcnA from *C. crescentus* (*C. c*) causes a severe cell cycle defect upon induction. C. Western  
530 blotting against CtrA shows that expression of *C. crescentus* CcnA indices an increase of CtrA levels  
531 in *S. meliloti* while its antisense has no effect.  
532  
533  
534

## 535 Author Contribution

536 WB and EGB conceived the experiments and wrote the manuscript. KP performed Probing. DL and  
537 WB performed MAPS. WB performed RNAseq. WB and MD performed microscopy analysis. NB,  
538 OV participated in the cloning and western blotting, respectively.

## 539 References

- 540 1. Beroual, W., Brillì, M., and Biondi, E.G. (2018). Non-coding RNAs Potentially Controlling  
541 Cell Cycle in the Model *Caulobacter crescentus*: A Bioinformatic Approach. *Front. Genet.* *9*,  
542 164.
- 543 2. Biondi, E.G., Reisinger, S.J., Skerker, J.M., Arif, M., Perchuk, B.S., Ryan, K.R., and Laub,  
544 M.T. (2006a). Regulation of the bacterial cell cycle by an integrated genetic circuit. *Nature*  
545 *444*, 899–904.
- 546 3. Biondi, E.G., Skerker, J.M., Arif, M., Prasol, M.S., Perchuk, B.S., and Laub, M.T. (2006b). A  
547 phosphorelay system controls stalk biogenesis during cell cycle progression in *Caulobacter*  
548 *crescentus*. *Mol. Microbiol.* *59*, 386–401.
- 549 4. Brillì, M., Fondi, M., Fani, R., Mengoni, A., Ferri, L., Bazzicalupo, M., and Biondi, E.G.  
550 (2010). The diversity and evolution of cell cycle regulation in alpha-proteobacteria: a  
551 comparative genomic analysis. *BMC Syst. Biol.* *4*, 52.
- 552 5. Chen, Y.E., Tropini, C., Jonas, K., Tsokos, C.G., Huang, K.C., and Laub, M.T. (2011). Spatial  
553 gradient of protein phosphorylation underlies replicative asymmetry in a bacterium. *Proc.*  
554 *Natl. Acad. Sci. U. S. A.* *108*, 1052–1057.
- 555 6. Christen, B., Abeliuk, E., Collier, J.M., Kalogeraki, V.S., Passarelli, B., Collier, J.A., Fero,  
556 M.J., McAdams, H.H., and Shapiro, L. (2011). The essential genome of a bacterium. *Mol.*  
557 *Syst. Biol.* *7*, 528.
- 558 7. Collier, J. (2012). Regulation of chromosomal replication in *Caulobacter crescentus*. *Plasmid*  
559 *67*, 76–87.
- 560 8. Collier, J., Murray, S.R., and Shapiro, L. (2006). DnaA couples DNA replication and the  
561 expression of two cell cycle master regulators. *EMBO J.* *25*, 346–356.
- 562 9. Collier, J., McAdams, H.H., and Shapiro, L. (2007). A DNA methylation ratchet governs  
563 progression through a bacterial cell cycle. *Proc. Natl. Acad. Sci. U. S. A.* *104*, 17111–17116.
- 564 10. Ducret, A., Quardokus, E.M., and Brun, Y.V. (2016). MicrobeJ, a tool for high throughput  
565 bacterial cell detection and quantitative analysis. *Nat. Microbiol.* *1*, 16077.
- 566 11. Dutta, T., and Srivastava, S. (2018). Small RNA-mediated regulation in bacteria: A growing  
567 palette of diverse mechanisms. *Gene*.
- 568 12. Fioravanti, A., Fumeaux, C., Mohapatra, S.S., Bompard, C., Brillì, M., Frandi, A., Castric, V.,  
569 Villeret, V., Viollier, P.H., and Biondi, E.G. (2013). DNA Binding of the Cell Cycle  
570 Transcriptional Regulator GcrA Depends on N6-Adenosine Methylation in *Caulobacter*  
571 *crescentus* and Other Alphaproteobacteria. *PLoS Genet.* *9*, e1003541.
- 572 13. Frandi, A., and Collier, J. (2019). Multilayered control of chromosome replication in  
573 *Caulobacter crescentus*. *Biochem. Soc. Trans.* *47*, 187–196.
- 574 14. Fröhlich, K.S., and Vogel, J. (2009). Activation of gene expression by small RNA. *Curr.*  
575 *Opin. Microbiol.* *12*, 674–682.
- 576 15. Fröhlich, K.S., Förstner, K.U., and Gitai, Z. (2018). Post-transcriptional gene regulation by an  
577 Hfq-independent small RNA in *Caulobacter crescentus*. *Nucleic Acids Res.* *46*, 10969–10982.
- 578 16. Gora, K.G., Tsokos, C.G., Chen, Y.E., Srinivasan, B.S., Perchuk, B.S., and Laub, M.T.  
579 (2010). A cell-type-specific protein-protein interaction modulates transcriptional activity of a  
580 master regulator in *Caulobacter crescentus*. *Mol. Cell* *39*, 455–467.
- 581 17. Greene, S.E., Brillì, M., Biondi, E.G., and Komeili, A. (2012). Analysis of the CtrA pathway  
582 in *Magnetospirillum* reveals an ancestral role in motility in alphaproteobacteria. *J. Bacteriol.*  
583 *194*, 2973–2986.
- 584 18. Haakonsen, D.L., Yuan, A.H., and Laub, M.T. (2015). The bacterial cell cycle regulator GcrA  
585 is a  $\sigma$ 70 cofactor that drives gene expression from a subset of methylated promoters. *Genes*  
586 *Dev.* *29*, 2272–2286.

- 587 19. Holtzendorff, J., Hung, D., Brende, P., Reisenauer, A., Viollier, P.H., McAdams, H.H., and  
588 Shapiro, L. (2004). Oscillating global regulators control the genetic circuit driving a bacterial  
589 cell cycle. *Science* *304*, 983–987.
- 590 20. Jacobs, C., Ausmees, N., Cordwell, S.J., Shapiro, L., and Laub, M.T. (2003). Functions of the  
591 CckA histidine kinase in *Caulobacter* cell cycle control. *Mol. Microbiol.* *47*, 1279–1290.
- 592 21. Joshi, K.K., Bergé, M., Radhakrishnan, S.K., Viollier, P.H., and Chien, P. (2015). An Adaptor  
593 Hierarchy Regulates Proteolysis during a Bacterial Cell Cycle. *Cell* *163*, 419–431.
- 594 22. Khan, S.R., Gaines, J., Roop, R.M., 2nd, and Farrand, S.K. (2008). Broad-host-range  
595 expression vectors with tightly regulated promoters and their use to examine the influence of  
596 TraR and TraM expression on Ti plasmid quorum sensing. *Appl. Environ. Microbiol.* *74*,  
597 5053–5062.
- 598 23. Lalaouna, D., Carrier, M.-C., Semsey, S., Brouard, J.-S., Wang, J., Wade, J.T., and Massé, E.  
599 (2015). A 3' external transcribed spacer in a tRNA transcript acts as a sponge for small RNAs  
600 to prevent transcriptional noise. *Mol. Cell* *58*, 393–405.
- 601 24. Lalaouna, D., Prévost, K., Eyraud, A., and Massé, E. (2017). Identification of unknown RNA  
602 partners using MAPS. *Methods San Diego Calif* *117*, 28–34.
- 603 25. Landt, S.G., Abeliuk, E., McGrath, P.T., Lesley, J.A., McAdams, H.H., and Shapiro, L.  
604 (2008). Small non-coding RNAs in *Caulobacter crescentus*. *Mol. Microbiol.* *68*, 600–614.
- 605 26. Landt, S.G., Lesley, J.A., Britos, L., and Shapiro, L. (2010). CrfA, a small noncoding RNA  
606 regulator of adaptation to carbon starvation in *Caulobacter crescentus*. *J. Bacteriol.* *192*, 4763–  
607 4775.
- 608 27. Laub, M.T., McAdams, H.H., Feldblyum, T., Fraser, C.M., and Shapiro, L. (2000). Global  
609 analysis of the genetic network controlling a bacterial cell cycle. *Science* *290*, 2144–2148.
- 610 28. Laub, M.T., Chen, S.L., Shapiro, L., and McAdams, H.H. (2002). Genes directly controlled by  
611 CtrA, a master regulator of the *Caulobacter* cell cycle. *Proc. Natl. Acad. Sci. U. S. A.* *99*,  
612 4632–4637.
- 613 29. Lott, S.C., Schäfer, R.A., Mann, M., Backofen, R., Hess, W.R., Voß, B., and Georg, J. (2018).  
614 GLASSgo – Automated and Reliable Detection of sRNA Homologs From a Single Input  
615 Sequence. *Front. Genet.* *9*.
- 616 30. Mandin, P., and Guillier, M. (2013). Expanding control in bacteria: interplay between small  
617 RNAs and transcriptional regulators to control gene expression. *Curr. Opin. Microbiol.* *16*,  
618 125–132.
- 619 31. Marczynski, G.T., and Shapiro, L. (2002). Control of chromosome replication in *caulobacter*  
620 *crescentus*. *Annu. Rev. Microbiol.* *56*, 625–656.
- 621 32. Marks, M.E., Castro-Rojas, C.M., Teiling, C., Du, L., Kapatral, V., Walunas, T.L., and  
622 Crosson, S. (2010). The genetic basis of laboratory adaptation in *Caulobacter crescentus*. *J.*  
623 *Bacteriol.* *192*, 3678–3688.
- 624 33. Montero Llopis, P., Jackson, A.F., Sliusarenko, O., Surovtsev, I., Heinritz, J., Emonet, T., and  
625 Jacobs-Wagner, C. (2010). Spatial organization of the flow of genetic information in bacteria.  
626 *Nature* *466*, 77–81.
- 627 34. Murray, S.M., Panis, G., Fumeaux, C., Viollier, P.H., and Howard, M. (2013). Computational  
628 and genetic reduction of a cell cycle to its simplest, primordial components. *PLoS Biol.* *11*,  
629 e1001749.
- 630 35. Nitzan, M., Rehani, R., and Margalit, H. (2017). Integration of Bacterial Small RNAs in  
631 Regulatory Networks. *Annu. Rev. Biophys.* *46*, 131–148.
- 632 36. Panis, G., Lambert, C., and Viollier, P.H. (2012). Complete genome sequence of *Caulobacter*  
633 *crescentus* bacteriophage  $\phi$ CbK. *J. Virol.* *86*, 10234–10235.
- 634 37. Panis, G., Murray, S.R., and Viollier, P.H. (2015). Versatility of global transcriptional  
635 regulators in alpha-Proteobacteria: from essential cell cycle control to ancillary functions.  
636 *FEMS Microbiol. Rev.* *39*, 120–133.
- 637 38. Pini, F., Frage, B., Ferri, L., De Nisco, N.J., Mohapatra, S.S., Taddei, L., Fioravanti, A.,  
638 Dewitte, F., Galardini, M., Brilli, M., et al. (2013). The DivJ, CbrA and PleC system controls  
639 DivK phosphorylation and symbiosis in *Sinorhizobium meliloti*. *Mol. Microbiol.* *90*, 54–71.
- 640 39. Pini, F., De Nisco, N.J., Ferri, L., Penterman, J., Fioravanti, A., Brilli, M., Mengoni, A.,  
641 Bazzicalupo, M., Viollier, P.H., Walker, G.C., et al. (2015). Cell Cycle Control by the Master



- 642 Regulator CtrA in *Sinorhizobium meliloti*. *PLoS Genet.* *11*, e1005232.  
643  
644 40. Quon, K.C., Marczyński, G.T., and Shapiro, L. (1996). Cell cycle control by an essential  
645 bacterial two-component signal transduction protein. *Cell* *84*, 83–93.  
646 41. Quon, K.C., Yang, B., Domian, I.J., Shapiro, L., and Marczyński, G.T. (1998). Negative  
647 control of bacterial DNA replication by a cell cycle regulatory protein that binds at the  
648 chromosome origin. *Proc. Natl. Acad. Sci. U. S. A.* *95*, 120–125.  
649 42. Reisenauer, A., and Shapiro, L. (2002). DNA methylation affects the cell cycle transcription  
650 of the CtrA global regulator in *Caulobacter*. *EMBO J.* *21*, 4969–4977.  
651 43. Reisenauer, A., Quon, K., and Shapiro, L. (1999). The CtrA response regulator mediates  
652 temporal control of gene expression during the *Caulobacter* cell cycle. *J. Bacteriol.* *181*, 2430–  
653 2439.  
654 44. Russell, J.H., and Keiler, K.C. (2009). Subcellular localization of a bacterial regulatory RNA.  
655 *Proc. Natl. Acad. Sci. U. S. A.* *106*, 16405–16409.  
656 45. Ryan, K.R., Huntwork, S., and Shapiro, L. (2004). Recruitment of a cytoplasmic response  
657 regulator to the cell pole is linked to its cell cycle-regulated proteolysis. *Proc. Natl. Acad. Sci.*  
658 *U. S. A.* *101*, 7415–7420.  
659 46. Schneider, C.A., Rasband, W.S., and Eliceiri, K.W. (2012). NIH Image to ImageJ: 25 years of  
660 image analysis. *Nat. Methods* *9*, 671–675.  
661 47. Schrader, J.M., Zhou, B., Li, G.-W., Lasker, K., Childers, W.S., Williams, B., Long, T.,  
662 Crosson, S., McAdams, H.H., Weissman, J.S., et al. (2014). The coding and noncoding  
663 architecture of the *Caulobacter crescentus* genome. *PLoS Genet.* *10*, e1004463.  
664 48. Skerker, J.M., and Laub, M.T. (2004). Cell-cycle progression and the generation of  
665 asymmetry in *Caulobacter crescentus*. *Nat. Rev. Microbiol.* *2*, 325–337.  
666 49. Skerker, J.M., Prasol, M.S., Perchuk, B.S., Biondi, E.G., and Laub, M.T. (2005). Two-  
667 component signal transduction pathways regulating growth and cell cycle progression in a  
668 bacterium: a system-level analysis. *PLoS Biol.* *3*, e334.  
669 50. Sommer, J.M., and Newton, A. (1988). Sequential regulation of developmental events during  
670 polar morphogenesis in *Caulobacter crescentus*: assembly of pili on swarmer cells requires  
671 cell separation. *J. Bacteriol.* *170*, 409–415.  
672 51. Tien, M.Z., Fiebig, A., and Crosson, S. (2017). Gene network analysis identifies a central  
673 post-transcriptional regulator of cellular stress survival. *BioRxiv* 212902.  
674 52. Zhan, Y., Yan, Y., Deng, Z., Chen, M., Lu, W., Lu, C., Shang, L., Yang, Z., Zhang, W.,  
675 Wang, W., et al. (2016). The novel regulatory ncRNA, NfiS, optimizes nitrogen fixation via  
676 base pairing with the nitrogenase gene *nifK* mRNA in *Pseudomonas stutzeri* A1501. *Proc.*  
677 *Natl. Acad. Sci. U. S. A.* *113*, E4348–4356.  
678 53. Zhou, B., Schrader, J.M., Kalogeraki, V.S., Abeliuk, E., Dinh, C.B., Pham, J.Q., Cui, Z.Z.,  
679 Dill, D.L., McAdams, H.H., and Shapiro, L. (2015). The global regulatory architecture of  
680 transcription during the *Caulobacter* cell cycle. *PLoS Genet.* *11*, e1004831.
